# Supplementary material
Source: PubMed Central journal article supplement (PMC3142581)

## Supporting Information

Spectroscopic and Electronic Structure Studies of a DMSO Reductase Caltalytic Intermediate:  
Implications for Electron and Atom Transfer Reactivity

Regina P. Mtei,<sup>1</sup> Ganna Lyashenko,<sup>2</sup> Benjamin Stein,<sup>1</sup> Nick Rubie,<sup>1</sup> Russ Hille,<sup>2\*</sup> and Martin L. Kirk<sup>1\*</sup>

<sup>1</sup>Department of Chemistry and Chemical Biology, The University of New Mexico, MSC03 2060,  
1 University of New Mexico, Albuquerque, NM 87131-0001; <sup>2</sup>Department of Biochemistry,  
University of California Riverside, Riverside, CA 92521

mkirk@unm.edu      russ.hille@ucr.edu

Contents:

S1. Active space orbitals used in SORCI calculations of the electronic absorption and MCD spectra for **1** (D = doubly occupied; S = singly occupied; U = unoccupied). Perspective view is looking down the pseudo 3-fold molecular “z” axis.

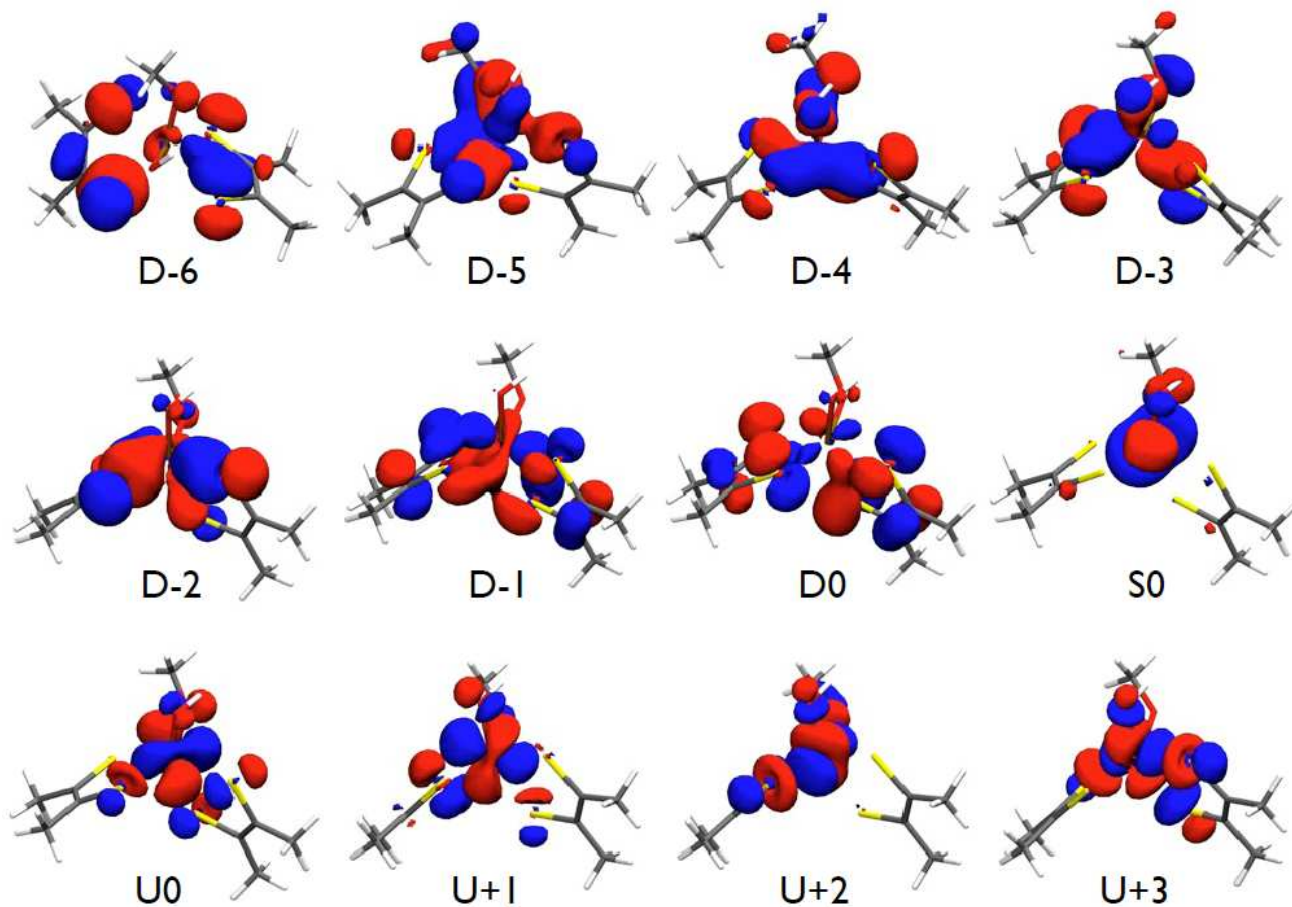

S2. Calculated reaction coordinate for DMSOR with TMAO as substrate showing the **TS** and the **I-P** intersection.

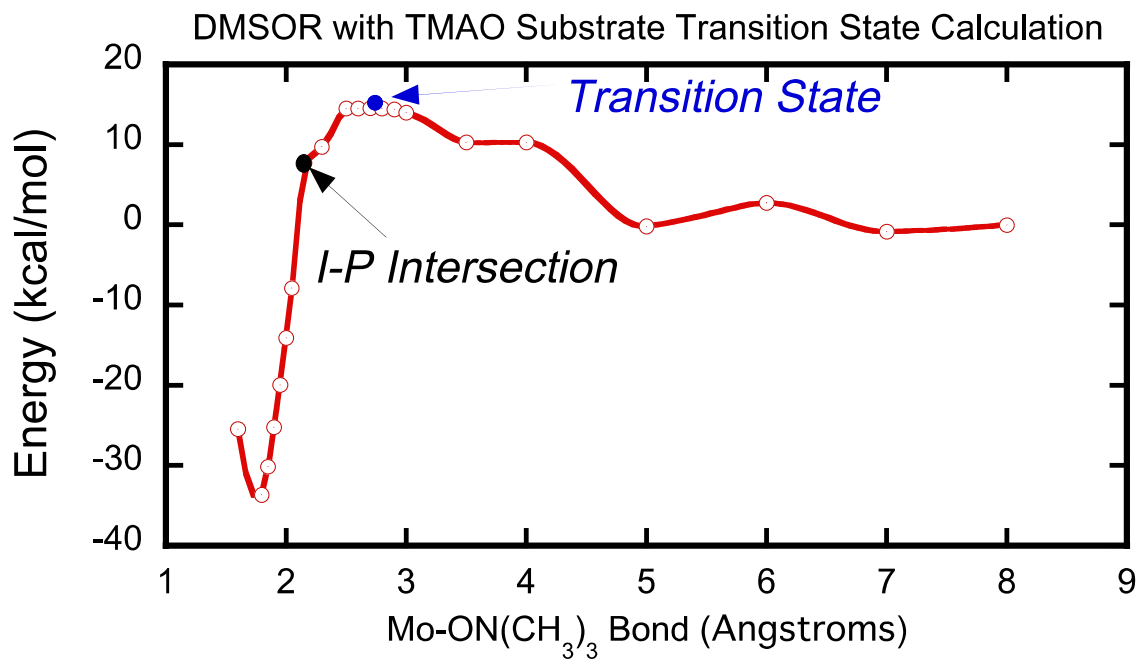

S3. C-term intensity for DMSOR intermediate at 5K and 7T.

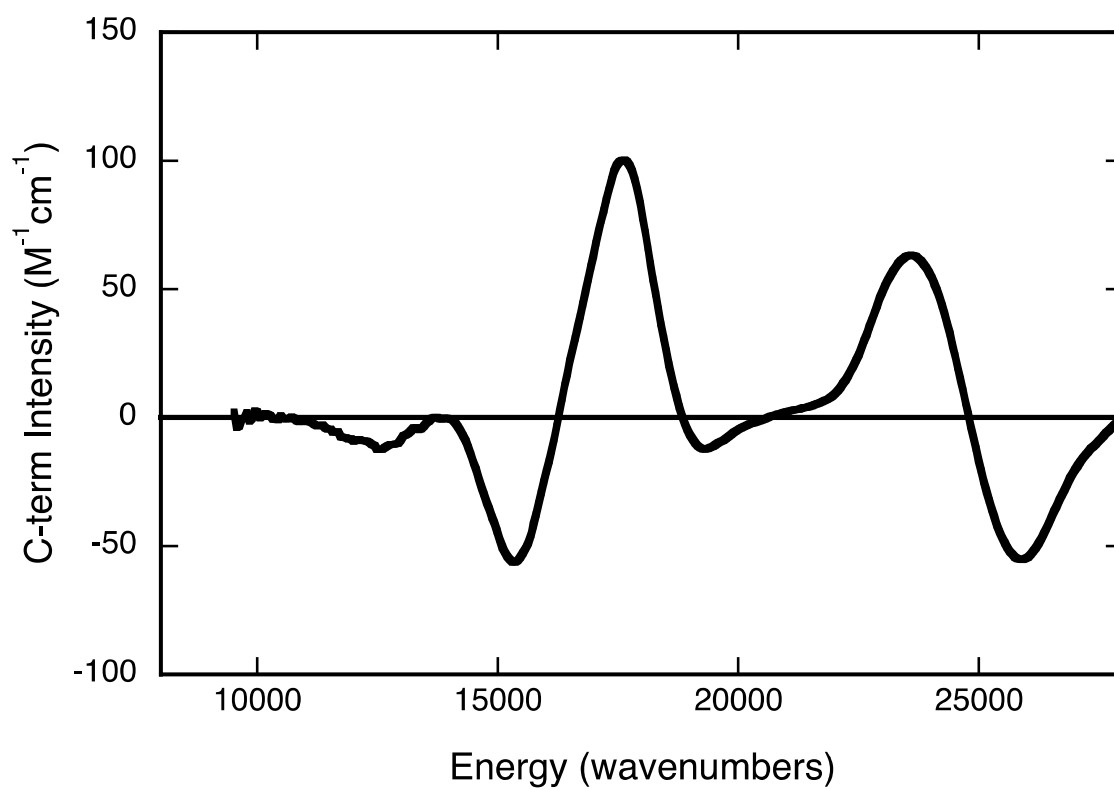

Supplement: NIHMS302026-supplement-1_si_001.pdf [file NIHMS302026-supplement-1_si_001.pdf]
